# Supplementary material for: A direct approach toward investigating DNA–ligand interactions via surface-enhanced Raman spectroscopy combined with molecular dynamics simulations
Source: Royal Society of Chemistry journal article supplement (doi:10.1039/d2cp04566d), 2022-12-23
Supplement: d2cp04566d1.pdf [file d2cp04566d1.pdf]

## Electronic Supplementary Information

# **A direct approach toward investigating DNA–ligand interactions via surface-enhanced Raman spectroscopy combined with molecular dynamics simulations**

*Yunpeng Wang,<sup>b‡</sup> Na Shi,<sup>a‡</sup> Yingying He,<sup>b</sup> Yang Li,<sup>\*b</sup> and Qingchuan Zheng<sup>\*a</sup>*

<sup>a</sup> Institute of Theoretical Chemistry, College of Chemistry, Jilin University, Changchun, 130023, China

<sup>b</sup> College of Pharmacy, Research Center for Innovative Technology of Pharmaceutical Analysis, Harbin Medical University, Harbin, Heilongjiang, 150081, China.

### **\*Corresponding Author**

E-mail: zhengqc@jlu.edu.cn (Qingchuan Zheng)

E-mail: liy@hrbmu.edu.cn (Yang Li)

‡ These authors contributed equally to this work.

## Table of Contents

1. **Figure S1.** CD spectra of ST and AP1 in aqueous and ammonium acetate buffer solutions.
2. **Figure S2.** The root-mean-square-deviation (RMSD) values of backbone atoms of DNA during the molecular dynamics simulations
3. **Figure S3.** UV-vis absorption spectrum of Ag@cit and Ag@I.
4. **Figure S4.** Detection of samples by dynamic light scattering method. Size and Zeta potential distribution of Ag@cit
5. **Figure S5.** TEM image of Ag@cit and Ag@I.
6. **Figure S6.** SERS spectrum of the acetonitrile.
7. **Figure S7.** CD spectra of ST before and after acetonitrile addition.
8. **Figure S8.** CD spectra of STA and APA.
9. **Figure S9.** SERS spectra of T12 sequence, pure argininamide and mixture after incubation.
10. **Table S1.** The SERS peak assign to DNA.

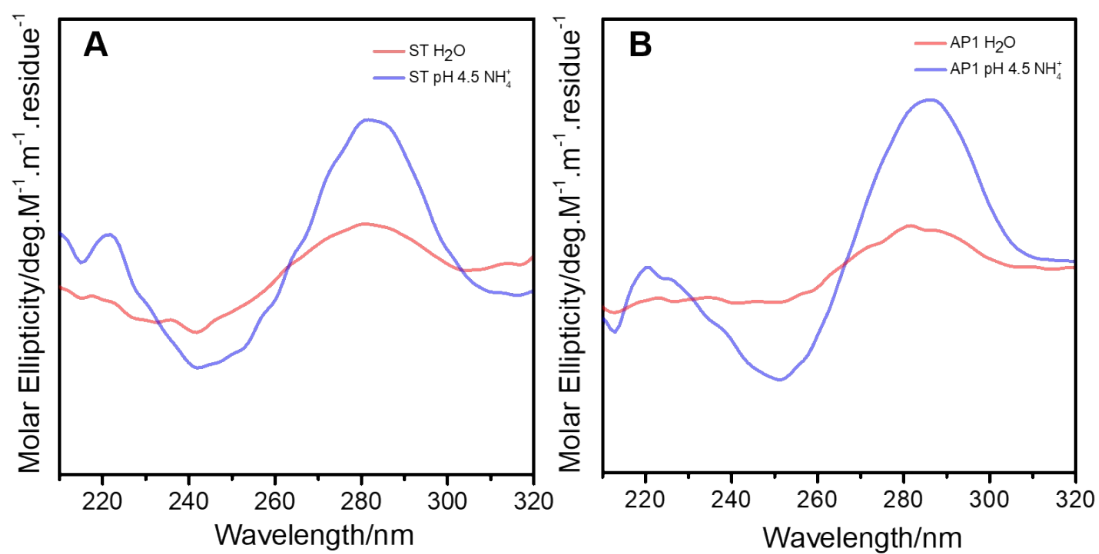

**Figure S1.** (A) CD spectra of ST in aqueous (red line) and ammonium acetate buffer solutions (pH=4.5; 500 mM) (blue line); (B) CD spectra of AP1 in aqueous (red line) and ammonium acetate buffer solutions (pH=4.5; 500 mM) (blue line)

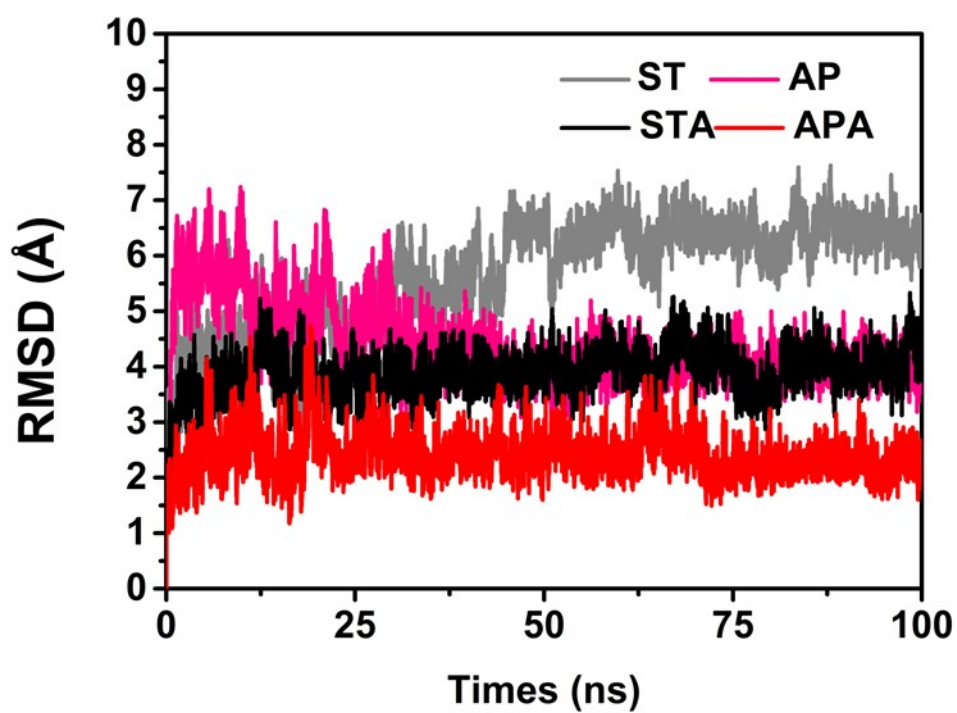

**Figure S2.** The root-mean-square-deviation (RMSD) values of backbone atoms of DNA during the molecular dynamics simulations

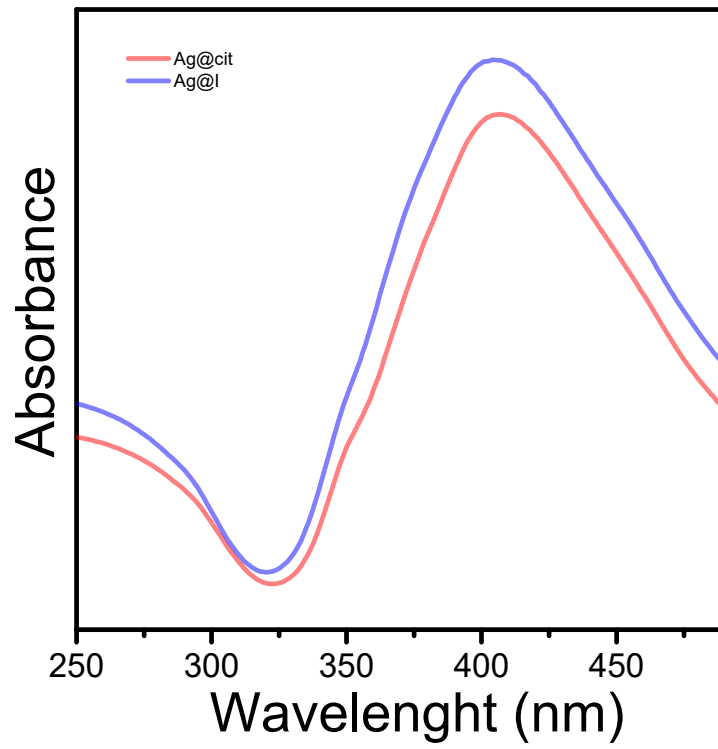

**Figure S3.** UV-vis absorption spectrum of Ag@cit and Ag@I.

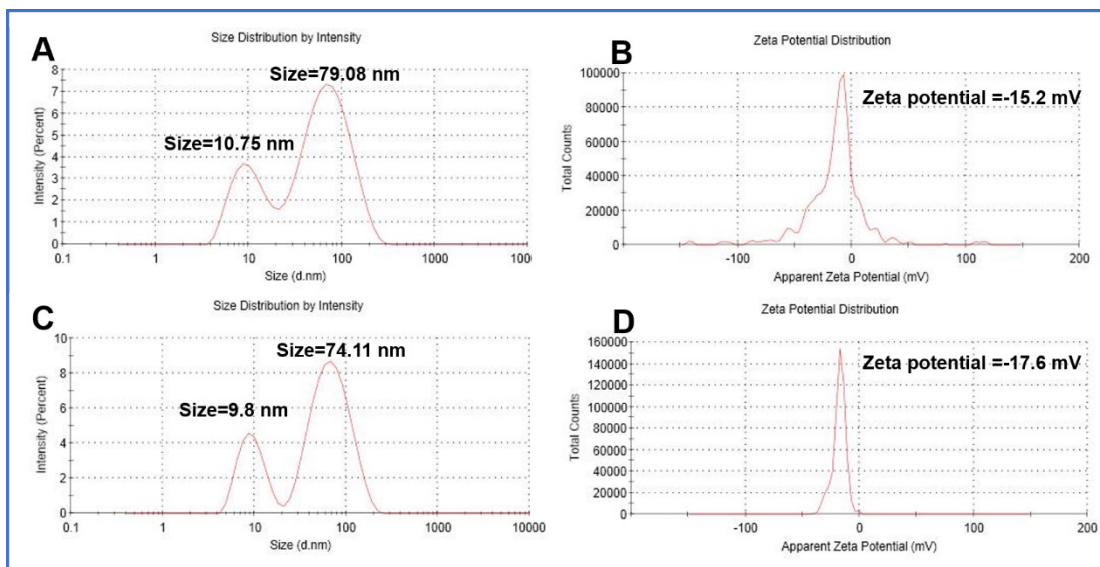

**Figure S4.** Detection of samples by dynamic light scattering method. Size and Zeta potential distribution of Ag@cit

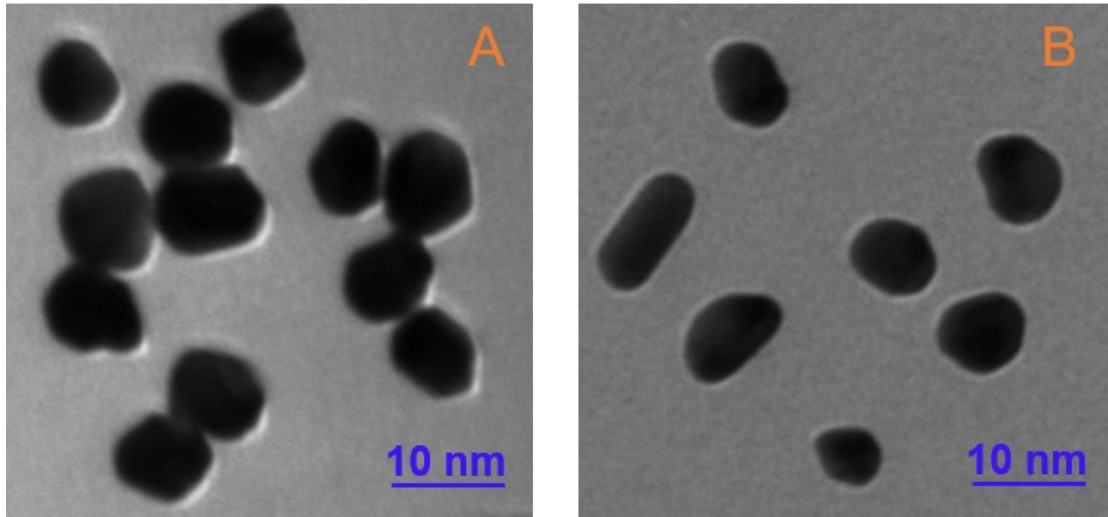

**Figure S5.** TEM image of Ag@cit(A) and Ag@I(B)

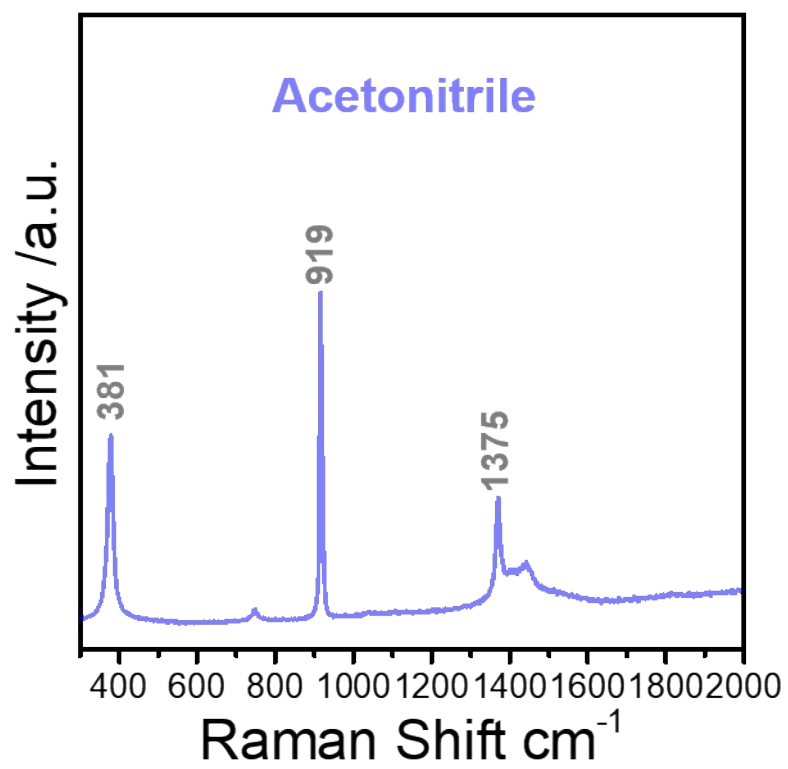

**Figure S6.** SERS spectrum of the acetonitrile.



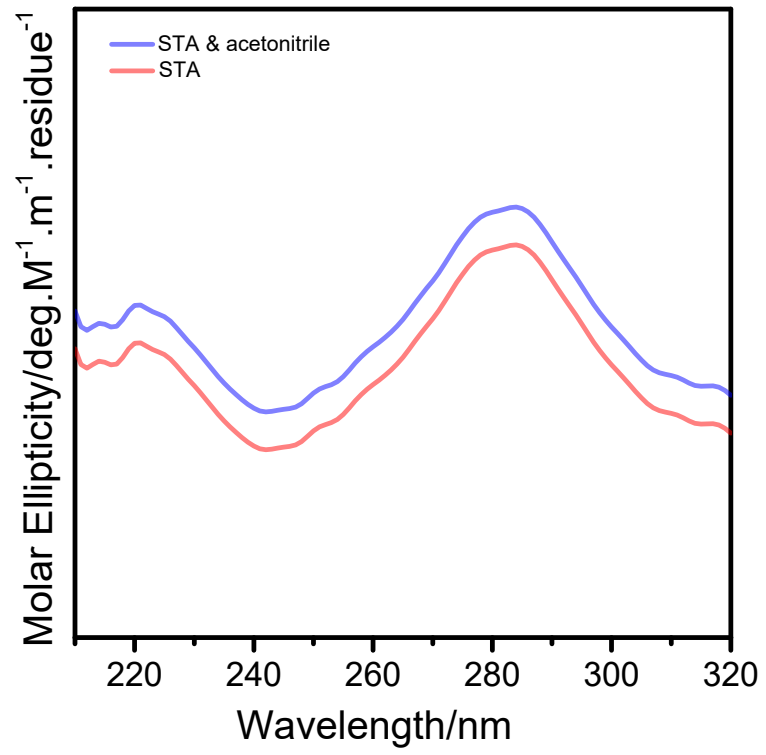

**Figure S7.** CD spectra of STA before (red line) and after (blue line) acetonitrile addition

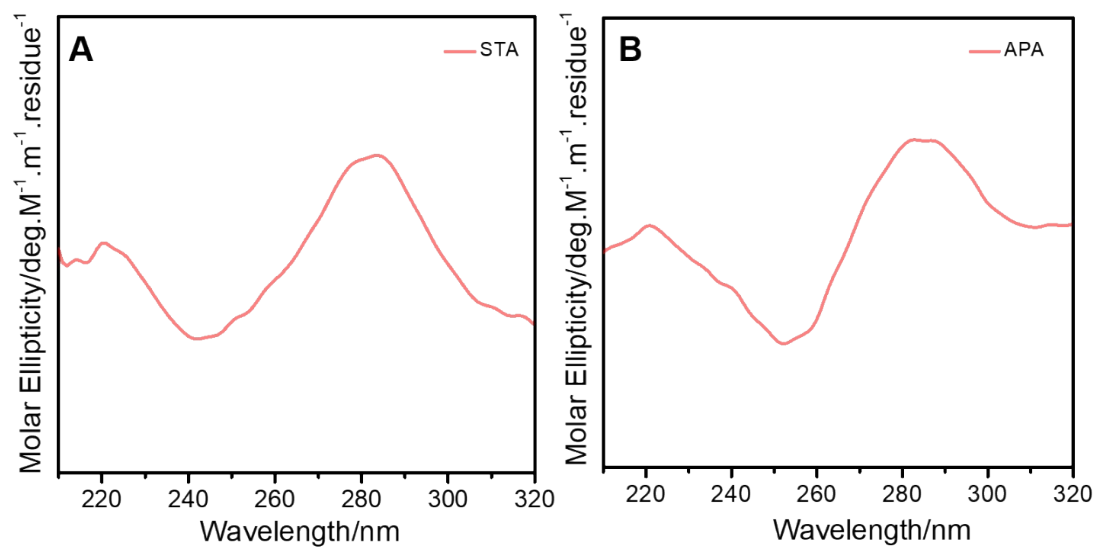

**Figure S8.** CD spectra of STA and APA

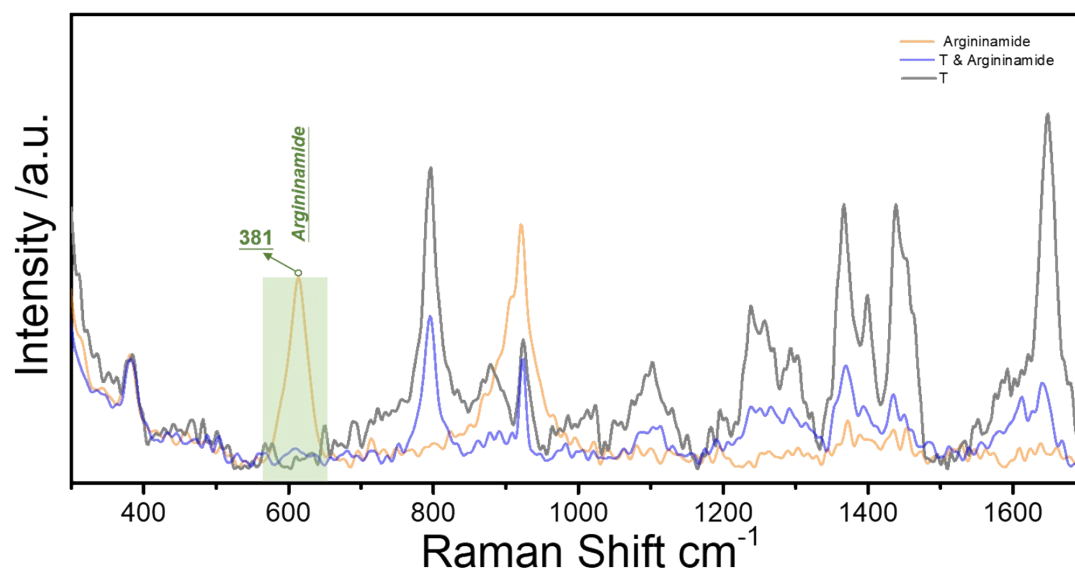

**Figure S9.** SERS spectra of T12 sequence, pure argininamide and mixture after incubation

**Table S1.** The SERS peak assign to DNA

| Raman Shift/cm <sup>-1</sup> | Assignment                           |                                                            | Ref.    |
|------------------------------|--------------------------------------|------------------------------------------------------------|---------|
| NH4 <sup>+</sup>             | DNA                                  | DNA/Ligand                                                 |         |
| 654                          | dG                                   | dG ring br, dG C2'-endo/anti                               | 1       |
| 731                          | dA                                   | dA ring br                                                 | 1       |
| 791                          | dT ring br                           | $\nu_s$ OPO, dT ring br                                    | 1       |
| 949-960                      | d                                    | d, dG $\delta$ R5                                          | 2       |
| 1089                         | $\nu_s$ , PO <sub>2</sub>            | $\nu_s$ PO <sub>2</sub> <sup>-</sup> , bk                  | 2, 3    |
| 1095                         | $\nu_s$ PO <sub>2</sub> <sup>-</sup> | bk[PO <sub>2</sub> <sup>-</sup> ]                          | 1, 2, 4 |
| 1188-1205                    | dT                                   | C, C <sup>+</sup> , C•C <sup>+</sup> , T                   | 5       |
| 1218-1227                    | dT                                   | C, C <sup>+</sup> , C•C <sup>+</sup> , T, dT C2'-endo/anti | 5, 6    |
| 1240-1245                    | dT                                   | dT, dG $\delta$ NH(N2)                                     | 2, 3    |
| 1258                         | dT                                   | dT, dG $\delta$ NH(N2)                                     | 2, 3    |
| 1268-1271                    | dC                                   | C, C <sup>+</sup> , C•C <sup>+</sup>                       | 5       |
| 1317-1319                    | -                                    | C <sup>+</sup> , C•C <sup>+</sup>                          | 9       |
| 1321-1323                    | dG                                   | dG C2'-endo/anti, C <sup>+</sup> , C•C <sup>+</sup>        | 4, 5    |
| 1349                         | dG                                   | dG $\nu$ (C-N) $\delta$ (C8-H) C2'-endo/anti               | 2, 3    |
| 1358-1365                    | -                                    | dG C2'-endo/syn                                            | 2       |
| 1407-1411                    | d                                    | C, C <sup>+</sup> , C•C <sup>+</sup>                       | 1, 3, 5 |
| 1573-1580                    | -                                    | dG $\delta$ NH (N2H interbase H-bone), C                   | 2       |
| 1635-1640                    | dT                                   | T[C=O], C, C <sup>+</sup> , C•C <sup>+</sup>               | 5       |

Note: d = deoxyribose,  $\nu$  = stretch,  $\delta$  = deformation, br = breathing, s = symmetric, bk = backbone

## References:

1. L.-J. Xu, Z.-C. Lei, J. Li, C. Zong, C. J. Yang and B. Ren, *J. Am. Chem. Soc.*, 2015, **137**, 5149-5154.
2. C. Krafft, J. M. Benevides and G. J. Thomas, Jr., *Nucleic Acids Res.*, 2002, **30**, 3981-3991.
3. Y. Li, X. Han, Y. Yan, Y. Cao, X. Xiang, S. Wang, B. Zhao and X. Guo, *Anal. Chem.*, 2018, **90**, 2996-3000.
4. J. Palacký, M. Vorlíčková, I. Kejnovská and P. Mojzeš, *Nucleic Acids Res.*, 2013, **41**, 1005-1016.
5. J. M. Benevides, C. Kang and G. J. Thomas, *Biochemistry*, 1996, **35**, 5747-5755.
6. O. Guselnikova, P. Postnikov, A. Pershina, V. Svorcik and O. Lyutakov, *Appl. Surf. Sci.*, 2019, **470**, 219-227.
